# Supplementary material for: Optimization of a Simplified and Effective Analytical Method of Pesticide Residues in Mealworms (Tenebrio molitor Larvae) Combined with GC–MS/MS and LC–MS/MS
Source: PubMed Central journal article supplement (PMC7435900; doi:10.3390/molecules25153518), 2020-07-31
Supplement: molecules-25-03518-s001.pdf [file molecules-25-03518-s001.pdf]

## Supplementary Materials for

# Optimization of a simplified and effective analytical method of pesticide residues in mealworms (*Tenebrio molitor* Larvae), combined with GC-MS/MS and LC-MS/MS

Leesun Kim<sup>1</sup>, Sujin Baek<sup>1</sup>, Kyungae Son<sup>2</sup>, Eunsun Kim<sup>3</sup>, Hyun Ho Noh<sup>1</sup>, Danbi Kim<sup>1</sup>, Min-seok Oh<sup>1</sup>, Byeong-chul Moon<sup>1</sup>, Jin-Ho Ro<sup>1,\*</sup>

<sup>1</sup>Chemical Safety Division, National Institute of Agricultural Sciences, RDA, Iseo-myeon, Wanju-gun, Jeollabuk-do 55365, South Korea

<sup>2</sup>Agromaterial Assessment Division, National Institute of Agricultural Sciences, RDA, Iseo-myeon, Wanju-gun, Jeollabuk-do 55365, South Korea

<sup>3</sup>Industrial Insect Division, National Institute of Agricultural Sciences, RDA, Iseo-myeon, Wanju-gun, Jeollabuk-do 55365, South Korea

| Content  |                                                                                                                                                                                       | Page |
|----------|---------------------------------------------------------------------------------------------------------------------------------------------------------------------------------------|------|
| Table S1 | The optimized GC-MS/MS parameters including retention time ( $t_R$ , min) of each pesticide, selected reaction monitoring transitions, and collision energy (CE, V).                  | S2   |
| Table S2 | The gradient program of liquid chromatography.                                                                                                                                        | S3   |
| Table S3 | The optimized LC-MS/MS parameters including retention time ( $t_R$ , min) of each pesticide, selected reaction monitoring transitions, and collision energy (CE, V), DP, EP, and CXP. | S3   |
| Table S4 | Concentrations of five pesticides analyzed in the real mealworm samples collected from 30 different farms in South Korea.                                                             | S4   |

---

\*Corresponding author. Tel: +82 63 238 2318; fax: +82 63 238 3837.  
E-mail address: [jhro@korea.kr](mailto:jhro@korea.kr)

**Table S1.** The optimized GC-MS/MS parameters including retention time ( $t_R$ , min) of each pesticide, selected reaction monitoring transitions, and collision energy (CE, V).

| Compounds           | $t_R$ (min) | Precursor ion>Product ion (CE, V) |                 |
|---------------------|-------------|-----------------------------------|-----------------|
|                     |             | Quantifier                        | Qualifier       |
| chlproprifos-methyl | 8.8         | 285.8>271.0 (16)                  | 287.8>93.0 (26) |
| deltamethrin        | 18.1        | 180.9>152 (26)                    | 252.8>93 (20)   |

**Table S2.** The gradient program of liquid chromatography.

| <b>Time (min)</b> | <b>Initial</b> | <b>11</b> | <b>15</b> | <b>16</b> | <b>20</b> |
|-------------------|----------------|-----------|-----------|-----------|-----------|
| A (%)             | 75             | 10        | 10        | 75        | 75        |
| B (%)             | 25             | 90        | 90        | 25        | 25        |

**Table S3.** The optimized LC-MS/MS parameters including retention time ( $t_R$ , min) of each pesticide, selected reaction monitoring transitions, and collision energy (CE, V), DP, EP, and CXP.

| <b>Compounds</b> | $t_R$ (min) | <b>Quantifier</b> | <b>DP</b> | <b>EP</b> | <b>CE</b> | <b>CXP</b> |
|------------------|-------------|-------------------|-----------|-----------|-----------|------------|
|                  |             | <b>Qualifier</b>  |           |           |           |            |
| fenoxanil        | 13.65       | 329.084>302.100   | 91        | 10        | 25        | 4          |
|                  |             | 329.084>86.100    | 69        | 10        | 67        | 4          |
| thiobencarb      | 14.70       | 258.100>125.000   | 76        | 10        | 45        | 4          |
|                  |             | 258.100>89.000    | 81        | 10        | 49        | 4          |
| fludioxonil      | 11.74       | 246.895>180.000   | 115       | 10        | 42        | 15         |
|                  |             | 246.895>126.000   | 115       | 10        | 42        | 11         |

**Table S4.** Residue concentrations of five pesticides analyzed in the real mealworm samples collected from 30 different farms in South Korea.

| No | Farm   | Concentration of pesticide residue (mg/kg) |              |           |             |             |
|----|--------|--------------------------------------------|--------------|-----------|-------------|-------------|
|    |        | Chlorpyrifos-methyl                        | Deltamethrin | Fenoxanil | Thiobencarb | Fludioxonil |
| 1  | YW1-1  | < 0.01                                     | < 0.01       | < 0.005   | < 0.005     | < 0.005     |
| 2  | YW2-1  | < 0.01                                     | < 0.01       | < 0.005   | < 0.005     | < 0.005     |
| 3  | YJ1-1  | < 0.01                                     | < 0.01       | < 0.005   | < 0.005     | < 0.005     |
| 4  | YI1-1  | < 0.01                                     | < 0.01       | < 0.005   | < 0.005     | < 0.005     |
| 5  | SC1-1  | < 0.01                                     | < 0.01       | < 0.005   | < 0.005     | < 0.005     |
| 6  | HC1-1  | < 0.01                                     | < 0.01       | < 0.005   | < 0.005     | < 0.005     |
| 7  | GJ1-1  | < 0.01                                     | < 0.01       | < 0.005   | < 0.005     | < 0.005     |
| 8  | GJ2-1  | < 0.01                                     | < 0.01       | < 0.005   | < 0.005     | < 0.005     |
| 9  | GJ3-1  | < 0.01                                     | < 0.01       | < 0.005   | < 0.005     | < 0.005     |
| 10 | SJ1-1  | < 0.01                                     | < 0.01       | < 0.005   | < 0.005     | < 0.005     |
| 11 | GYC1-1 | < 0.01                                     | < 0.01       | < 0.005   | < 0.005     | < 0.005     |
| 12 | GYC2-1 | < 0.01                                     | < 0.01       | < 0.005   | < 0.005     | < 0.005     |
| 13 | PH1-1  | < 0.01                                     | < 0.01       | < 0.005   | < 0.005     | < 0.005     |
| 14 | PH2-1  | < 0.01                                     | < 0.01       | < 0.005   | < 0.005     | < 0.005     |
| 15 | DJ1-1  | < 0.01                                     | < 0.01       | < 0.005   | < 0.005     | < 0.005     |
| 16 | US1-1  | < 0.01                                     | < 0.01       | < 0.005   | < 0.005     | < 0.005     |
| 17 | GS1-1  | < 0.01                                     | < 0.01       | < 0.005   | < 0.005     | < 0.005     |
| 18 | DY1-1  | < 0.01                                     | < 0.01       | < 0.005   | < 0.005     | < 0.005     |
| 19 | DY2-1  | < 0.01                                     | < 0.01       | < 0.005   | < 0.005     | < 0.005     |
| 20 | DY3-1  | < 0.01                                     | < 0.01       | < 0.005   | < 0.005     | < 0.005     |
| 21 | JS101  | < 0.01                                     | < 0.01       | < 0.005   | < 0.005     | < 0.005     |
| 22 | JS2-1  | < 0.01                                     | < 0.01       | < 0.005   | < 0.005     | < 0.005     |
| 23 | GC1-1  | < 0.01                                     | < 0.01       | < 0.005   | < 0.005     | < 0.005     |
| 24 | GC2-1  | < 0.01                                     | < 0.01       | < 0.005   | < 0.005     | < 0.005     |
| 25 | GC3-1  | < 0.01                                     | < 0.01       | < 0.005   | < 0.005     | < 0.005     |
| 26 | CYC1-1 | < 0.01                                     | < 0.01       | < 0.005   | < 0.005     | < 0.005     |
| 27 | CYC2-1 | < 0.01                                     | < 0.01       | < 0.005   | < 0.005     | < 0.005     |
| 28 | CYC3-1 | < 0.01                                     | < 0.01       | < 0.005   | < 0.005     | < 0.005     |
| 29 | CYC4-1 | < 0.01                                     | < 0.01       | < 0.005   | < 0.005     | < 0.005     |
| 30 | CYC5-1 | < 0.01                                     | < 0.01       | < 0.005   | < 0.005     | < 0.005     |
